# Supplementary material for: A Photoperiod-Regulating GeneCONSTANSIs Correlated to Lipid Biosynthesis inChlamydomonas reinhardtii
Source: Hindawi journal article supplement (doi:10.1155/2015/715020), 2015-01-01
Supplement: f1 [file 715020.f1.pdf]

1

2 **A photoperiod-regulating gene *CONSTANS* is correlated to lipid biosynthesis in**  
3 ***Chlamydomonas reinhardtii***

4

5 Xiaodong Deng<sup>1</sup>, Xinzhao Fan<sup>1</sup>, Ping Li<sup>1</sup>, and Xiaowen Fei<sup>2\*</sup>

6

7 <sup>1</sup>Key Laboratory of Tropical Crop Biotechnology, Ministry of Agriculture, Institute of Tropical  
8 Bioscience and Biotechnology, Chinese Academy of Tropical Agricultural Science, Haikou 571101,  
9 China.

10 <sup>2</sup>School of Science, Hainan Medical College, Haikou, 571101, China.

11

12 \*Corresponding author. E-mail: Feixw2000@hotmail.com Tel: +86-898-66960173.

13 Fax: +86-898-66890978.

14

15 **Abstract**

16 **Background**

17 The regulation of lipid biosynthesis is essential in photosynthetic eukaryotic cells. Thus far, studies on lipid  
18 metabolism in microalgae have focused on the analysis of key enzymes and genes that are also involved in  
19 photosynthetic carbon flow. No regulatory genes have been reported in the lipid metabolism pathway. Plant *CONSTANS*  
20 (*CO*) gene regulates blooming by participating in photoperiod and biological clock. Apart from regulating photoperiod,  
21 the *Chlamydomonas CO* gene also regulates starch content by regulating the granule-bound starch synthase (GBSSI)  
22 gene. As such, the regulation of lipid biosynthesis is essential in photosynthetic eukaryotic cells.

23 **Results**

24 In this study, the detection of lipid content in HSM-S indicated that cells accumulated a significant amount of lipids  
25 at short-day conditions than at long-day conditions. While in *Chlamydomonas* CC425, the *CrCO* mRNA level decreased  
26 in the -S medium compared with that in the HSM medium which indicate that the *CrCO* mRNA level was negatively  
27 correlated to lipid accumulation at the -S conditions. The silencing of the *CrCO* gene via RNA interference (RNAi)

1 resulted in an increase in lipid content by 13.5% to 35.2%, which was analyzed via the Nile red fluorescence method,  
2 and an increase in triacylglyceride (TAG) level by 24.5%. *CrCO* RNAi strains accumulated more lipids at short-day  
3 conditions than at long-day conditions. The decrease in *CrCO* expression resulted in the increased expression of TAG  
4 biosynthesis-related genes, such as acyl-CoA:diacylglycerol acyltransferase, phosphatidate phosphatase, and  
5 phospholipid:diacylglycerol acyltransferase, whereas citrate synthase and fructose-1,6-bisphosphatase genes showed a  
6 decrease in their mRNA when the *CrCO* expression was suppressed. On the other hand, the overexpression of *CrCO*  
7 resulted in a decrease in lipid content by 26.2% to 36.0% and a decrease in TAG level by 19.4%. In summary, the results  
8 of this study revealed a relationship between *CrCO* gene and lipid metabolism in *Chlamydomonas*.

## 9 **Conclusions**

10 Observations made in this paper suggest that the regulation of the *CrCO* gene can control the lipid content of algae  
11 cells. The findings of this study suggest that increasing oil by suppressing *CrCO* expression in microalgae is feasible.

12  
13 **Keywords:** *CrCO*; lipid biosynthesis; RNAi interference; *Chlamydomonas reinhardtii*; nutrition  
14 deprivation, photoperiodism

## 16 **Introduction**

17 Given the risk of depleting traditional fossil fuels such as oil and coal, people have now realized the urgent need to  
18 develop renewable energy sources. Thus, the use of biodiesel from microalgae as an important source of renewable  
19 energy and as a vital alternative energy source of future fossil fuel has attracted increasing attention from scholars and  
20 enterprises. Autotrophic microalgae convert solar energy into biomass energy, which fix a large amount of CO<sub>2</sub> and store  
21 the biomass energy as lipids in cells in specific strains. For a long time, studies on the lipid metabolism pathway of  
22 microalgae lagged behind studies on most crops such as rice, wheat, corn, and so on. More studies have been  
23 concentrated on the mechanism of lipid metabolism and high-density culture, which are significant to the genetic  
24 improvement of high quality strains and the industrialization of aquaculture.

25 Photoperiodism, a ubiquitous feature of plants, is the response of plants to the relative length of day and night.  
26 Photoperiodism is a key factor that affects plant conversion from vegetative growth to reproductive growth as well as the  
27 plant's flowering time, which is regulated by a large and complex genetic network [1]. *CONSTANS* (*CO*) is an important  
28 gene that regulates both plant photoperiod and flowering time [2, 3]. *CO* homologous genes were identified in a few  
29 plants, such as *Hdl* of rice [4], *TaHdl* of *Triticum aestivum* [5], *StCO* of *Solanum tuberosum* [6,7], and *CrCO* of

1 *Chlamydomonas reinhardtii* [8] by the screening the library and by homology-based cloning with the *CO* gene sequence  
2 of *Arabidopsis*. Meanwhile, *CO* homologous genes have been cloned in different species, including rape plants, eastern  
3 cottonwood [9], barley [10], tomato [11], pharbitisnil [12], spiderflower [13], radish [14], pea [15], perennial ryegrass  
4 [16], and so on.

5 *CO* genes were found in multiple copies in most plant genomes that have been studied. A total of 17 homologous  
6 genes were found in *Arabidopsis* [17], 16 in rice [18], three in *Solanum lycopersicum* [19], four in *Brassica napus* [20],  
7 and two in *Picea abies* [21]. *CO* is a zinc finger transcription factor that contains B-box and CCT conservative domains  
8 and a variable region in the middle [22–25]. The N-terminal of *CO* has two sequential B-box domains designated as  
9 double B-box (DBB). The B-box domain of *CO* interacts with proteins [26], in which the cysteine and histidine that bind  
10 to zinc ion are highly conserved. Conservative amino acid mutations resulted in a delay in flower production [27].  
11 Ben-Naim used the B-box of *TCOL1* as bait to analyze its interaction with immunophilin and/or other proteins that  
12 contain B-box and determined that B-box mainly functions with proteins [28]. The C-terminal of the *CO* protein is  
13 composed of 70 to 80 amino acids, in which approximately 40 are highly conserved in the *CO* family [27, 29]. Moreover,  
14 the CCT domain of *CO* contains a nuclear localization signal that interacts with *COP1* of the ubiquitin ligase [30]. In the  
15 present study, the mechanism of combining *CO* with DNA is unclear, although speculation indicated that *CO* binds to  
16 DNA via its CCT domain to form a complex compound.

17 Aside from the DBB zinc finger and the CCT domain, the B-box family of *Arabidopsis* also contains DBB  
18 homologous *CO* subfamilies, which have two DBB domains in the N-terminal that are separated by 8 to 15 amino acids,  
19 whereas the C-terminal does not contain any CCT domains. DBB homologous subfamilies are encoded by eight genes,  
20 namely, *DBB1a* (At2g21320), *DBB1b* (At4g38960), *DBB2* (At4g39070), *DBB3* (At1g78600), *DBB4* (At4g10240), *STO*  
21 (At1g06040), *STH* (At2g31380), and *STH2* (At1g75540) [31]. To date, four of the eight genes have been found to be  
22 involved in light-mediated plant growth and development. *STO* has a function in plant salt tolerance and negatively  
23 regulates phytochrome and blue light signal transduction pathway [32]. *STH* have a similar function with *STO*, and they  
24 both interact with ubiquitin ligase *COP1* [33]. Both *DBB3* and *STH2* participate in regulating plant hypocotyl elongation,  
25 early chloroplast development, anthocyanin accumulation, and in the positive regulation of de-etiolation in *Arabidopsis*  
26 [33–35].

27 Functions of *CO* in microalgae have also been reported. Serrano et al. determined that *CrCO* regulates  
28 light cycle in *Chlamydomonas*, and both knockdown and overexpression of *CrCO* changed the diurnal  
29 cycle of the cells. Thus, related gene expression and physiological functions are regulated [8]. Ral et al.

1 determined that CrCO participates in starch synthesis by regulating the *GBSSI* gene [36]. *Chlamydomonas*  
2 *CO* gene reported by Serrano et al. was used to perform a BLASTP search in the *Chlamydomonas* database Phytozome,  
3 and only one homology, g6302, was found (100% identified). Other homologous protein containing the B-box domain  
4 was not detected. Nevertheless, seven genes that encode proteins containing the CCT domain were homologous to the  
5 *CrCO* gene. Based on the number and conservative property of B-box, 17 genes of the *CO* gene family can be divided  
6 into three subgroups in *Arabidopsis* [27, 29]. In addition, eight genes encoded proteins that are homologous to the DBB  
7 protein subfamily, namely, DBB1 to DBB4, STO, STH, and STH2 [31]. These genes regulate multiple physiological  
8 functions in plants, such as bloom, biological clock, photoperiod, growth and development (DBB1 to DBB4),  
9 salt-tolerance (STO), light signal transduction, hypocotyl elongation (DBB3 and STH2), early formation of the  
10 chloroplast, and accumulation of anthocyanin [32–35]. Compared with the mass of genes encoding the DBB subfamily  
11 of the CO protein in *Arabidopsis*, only one gene encoding the CO protein was found in *Chlamydomonas*, which indicates  
12 that higher plants and single CO gene in *Chlamydomonas* had complex functions such as the regulation of flower  
13 production and multicellular development.

14 To date, CrCO have not been proven to be involved in regulating lipid metabolism. In the field of microalgae lipid  
15 metabolism mechanism research, studies have concentrated on genes involved in the lipid synthesis pathway and  
16 photosynthetic carbon metabolism pathway, not on regulating genes. The present study discussed the function of *CrCO*  
17 gene in lipid accumulation in microalgae cells via the knockdown and overexpression of *CrCO* in *Chlamydomonas*.  
18 Furthermore, the relationship between *CrCO* gene and lipid metabolism was revealed by analyzing lipid accumulation at  
19 adverse -P and -S conditions and at long-day and short-day conditions.

20  
21

## 22 **Results and analysis**

### 23 **1. *Chlamydomonas* accumulated more lipids in short day (SD) than in long day (LD) under –S** 24 **conditions .**

25 *C. reinhardtii* CC425 was inoculated in a 50 mL Erlenmeyer flask containing an HSM medium and grown until the  
26 mid-log phase ( $2 \times 10^6$ ). The cells were collected after centrifugation and then equally divided into three parts. Each  
27 triplet was inoculated in 30 mL medium of HSM, HSM-S, and HSM-P and grown at LD condition (16 h light and 8 h  
28 dark). Identical triplets were grown in SD conditions (8 h light and 16 h dark). The cells grew slightly slower in SD  
29 conditions than in LD conditions in HSM. Moreover, cell proliferation was greatly reduced in HSM-S compared with

1 that in HSM in LD or SD conditions, whereas the length of daylight did not affect cell growth in HSM-P (Figures 1 and  
2 2). The lipid contents in both HSM and HSM-P in SD conditions were no significant difference compared to the  
3 corresponding lipid contents in LD conditions (Figures 1 and 2), whereas the lipid content significantly increased in SD  
4 conditions compared with that in LD conditions in HSM-S.

## 6 **2. Analysis of the relationship between *CrCO* mRNA level and lipid accumulation at -S and -P** 7 **conditions.**

8 The *CrCO* mRNA level remarkably decreased in HSM-P compared with that in HSM. Moreover, the *CrCO* mRNA level  
9 decreased in HSM-S compared with that in the control sample (Figure 3). The lipid content remarkably increased in  
10 HSM-S compared with that in the control sample (Figure 1). The results illustrate that the *CrCO* mRNA level was  
11 negatively correlated with lipid accumulation at -S conditions.

## 13 **3. Silencing of *CrCO* gene increases TAG content in *C. reinhardtii***

14 Approximately 1230 bp full-length CDS of *CrCO* DNA fragment was amplified via PCR and cloned into pMD18T and  
15 sequenced thereafter. This fragment exhibited 100% homology with the *Chlamydomonas CO* gene (g6302.t1). To  
16 determine the relationship between *CrCO* expression and lipid accumulation, the effects of the artificial silencing of  
17 *CrCO* gene on the lipid content of *C. reinhardtii* were examined. Based on the *CrCO* (g6302.t1) sequences of the gene  
18 retrieved from the Phytozome *C. reinhardtii* database (<http://www.phytozome.net/>), primers used to amplify the  
19 fragment of the coding region of *CrCO* were designed. The DNA fragments were subcloned and then used to generate  
20 *CrCO* RNAi constructs pMaa7IR/CrCO IR. More than 100 positive transformants were obtained after transforming the  
21 silencing construct into *C. reinhardtii* CC425. Three transgenic algae were selected to measure the lipid content and  
22 mRNA levels of the target gene. Strains transformed with the vector pMaa7IR/XIR were used as control samples. In  
23 cells harboring the *CrCO* construct, analysis results of the transgenic lines via the Nile red fluorescence method indicate  
24 an increase in the lipid content by 13.5% to 35.2% (Figure 4B) after 10 days of cultivation. The TAG level of the  
25 transgenic strain CrCO RNAi18 increased by 24.5% compared with that in the control sample (Figure 4C). To evaluate  
26 the effectiveness of the RNAi construct, the abundance of the target gene-specific mRNA in transgenic algae was  
27 analyzed via real-time PCR. The *CrCO* mRNA abundance decreased by 90.4% to 95.2% (Figure 4D), which indicates  
28 the high-efficiency silencing by these constructs.

29 Subsequently, the mRNA levels of phospholipid:diacylglycerol acyltransferase *PDAT3*, acyl-CoA:diacylglycerol

1 acyltransferase (*DGAT2*), phosphofructokinase (*PFK2*), fructose-1,6-bisphosphatase (*FBP1*), citrate synthase (*CIS*), and  
2 phosphatidate phosphatase (*PAP2*) genes were measured in transgenic strain CrCO RNAi18. Genes such as *PDAT3*,  
3 *DGAT2*, and *PAP2* are directly related to lipid synthesis, which increase the mRNA levels in transgenic strain compared  
4 with that in non-transgenic *C. reinhardtii* CC425 and Maa7IR/XIR transgenic algae. On the other hand, the *CIS* gene, a  
5 key enzyme in tricarboxylic acid cycle, and the *FBP1* gene, which is found in gluconeogenesis, showed a decrease in  
6 their mRNA in the transgenic strain (Figure 5). The results indicate the regulation of *CIS* and *FBP1* genes by *CrCO*,  
7 which exhibits negative effects on the regulation of the expression of lipid biosynthesis genes, such as *PDAT3*, *DGAT2*,  
8 and *PAP2*. The *FBP1* and *CIS* genes exhibited decreased mRNA in the transgenic strain, CrCO RNAi18, and a  
9 glycolysis enzyme, *PFK2*, exhibited increased mRNA in the transgenic strain, which indicate that more carbon are  
10 introduced to the fatty acid and lipid synthesis (Figure 5).

11 Results similar to the above discussion were obtained via Nile Red staining. More oil droplets were found in CrCO  
12 RNAi18 transgenic algae compared with that in pMaa7IR/XIR transgenic algae, as determined via microscopic analysis  
13 (Figure 6). This result indicates an increase in cell lipid content via the regulation of *CrCO* gene expression.

14 Considering that *CrCO* gene regulates photoperiod, would the lipid content of cells at SD or LD conditions change  
15 via RNAi-initiated *CrCO* knockdown? The results indicate that transgenic strains exhibited higher lipid content at SD  
16 condition than at LD condition (Figures 7A and 7B). The lipid content was measured at both -S and -P conditions in  
17 transgenic strains, and the results indicate that more lipids were accumulated at SD condition than at LD condition  
18 (Figures 7C–7F). Thus, more lipids are produced in RNAi transgenic strains compared with that in the control sample  
19 regardless of the cultivation conditions.

#### 21 **4. Overexpression of *CrCO* reduced the lipid content of *C. reinhardtii***

22 The increase in lipid content caused by the RNAi silencing of *CrCO* suggests the effect of the expression of these  
23 genes on the biosynthesis of triglycerides in *C. reinhardtii*. Thus, the capacity of *CrCO* overexpression to reduce the  
24 lipid content of *C. reinhardtii* was determined. Vector pCAMCO, which expresses *CrCO* gene from the CAMV 35S  
25 promoter, was introduced into *C. reinhardtii*. The lipid contents and growth rate of three randomly selected transgenic  
26 algae were determined in each transgenic algae line. The overexpression of the *CrCO* gene increased the growth rate of  
27 the algae in the early stages from day two to day four (Figure 8A). Moreover, the overexpression of *CrCO* decreased the  
28 lipid content of the transgenic algae compared with that in the control pCAMBIA1302 transgenic algae lines. For

1 example, six days after the growth of algae in the HSM medium in full daylight, the lipid contents of  
2 *CrCO*-overexpressing transgenic lines decreased by 26.2% to 36.0%, as determined via the Nile Red fluorescence  
3 method (Figure 8B). The TAG level of the transgenic strain, pCACO64, decreased by 19.4% compared with the TAG  
4 level of the control sample (Figure 8C). Compared with the mRNA levels of pCAMBIA1302 transgenic strains, the  
5 mRNA levels of *CrCO* increased by 27 to 29 times (Figure 8D). In summary, the overexpression of *CrCO* gene  
6 decreases lipid synthesis in cells. Decreased lipid content was also observed via Nile red dye staining (Figure 9). Fewer  
7 oil droplets were found in *CrCO*-overexpressed transgenic algae compared with the that in the control sample.

## 8 **Discussion**

9 *Chlamydomonas* CO has a typical DBB zinc finger domain and a CCT domain in the C-terminal, which has been proven  
10 to regulate photoperiod. Moreover, *CrCO* has a function in controlling starch content in *Chlamydomonas* by regulating  
11 the effects of *GBSSI* gene expression. In this study, *CrCO* was shown to regulate lipid accumulation. The mRNA level  
12 of the CO gene of *Chlamydomonas* decreased at -S condition via digital gene expression (DGE) profiling. Considering  
13 the increase in the lipid content at -S condition in cells, knockdown and overexpression of the CO gene in  
14 *Chlamydomonas* cells were performed to determine the relationship between the CO gene and lipid accumulation. The  
15 results indicate that the CO gene was closely correlated to lipid accumulation because the silencing of the CO gene  
16 results in an increase in the lipid content and the overexpression of the CO gene results in a decrease in the lipid content.  
17 In addition, the silencing of the CO gene caused the mRNA level of genes to contribute to lipid synthesis, such as  
18 *DGAT2*, *DGAT1*, and *PAP2*, which were optimized at daytime. Therefore, we hypothesized that *CrCO* facilitates  
19 indirect lipid production by regulating gene-encoding enzymes in the lipid synthesis pathway, namely, *DGAT1*, *DGAT2*,  
20 and *PAP2*. The SD condition exhibited positive effects on lipid accumulation compared with the LD condition, which  
21 was more significant in the -S condition. This conclusion was consistent with the findings that lipid content changes in  
22 CO knockdown transgenic algae strains. In future studies, emphasis must be given on how the CO gene regulates lipid  
23 synthesis gene expression, such as those of *DGAT1*, *DGAT2*, and *PAP2*.

24

## 25 **Materials and methods**

### 26 **Bioinformatics, algal strain, cultivation conditions, and biomass assay**

27 The information on the *Chlamydomonas* CO gene (g6302) was obtained from the Phytozome V9.1  
28 *Chlamydomonas* database (<http://www.phytozome.net>). *C. reinhardtii* CC425 (mt) was purchased from

1 the *Chlamydomonas* Genetics Center at Duke University. The cells grown on tris-acetate-phosphate (TAP)  
2 agar plate were inoculated into 100 mL Erlenmeyer flasks containing 50 mL of HSM, P-deficient HSM  
3 (HSM-P), and S-deficient HSM (HSM-S) media [37]. The HSM medium was composed of NH<sub>4</sub>Cl (0.500  
4 g·L<sup>-1</sup>), MgSO<sub>4</sub>·7H<sub>2</sub>O (0.020 g·L<sup>-1</sup>), CaCl<sub>2</sub>·2H<sub>2</sub>O (0.010 g·L<sup>-1</sup>), K<sub>2</sub>HPO<sub>4</sub> (1.440 g·L<sup>-1</sup>), KH<sub>2</sub>PO<sub>4</sub> (0.720  
5 g·L<sup>-1</sup>), NaAc (2.000 g·L<sup>-1</sup>), H<sub>3</sub>BO<sub>3</sub> (0.001 g·L<sup>-1</sup>), MnCl<sub>2</sub>·4H<sub>2</sub>O (0.005 g·L<sup>-1</sup>), ZnSO<sub>4</sub>·7H<sub>2</sub>O (0.022 g·L<sup>-1</sup>),  
6 FeSO<sub>4</sub>·7H<sub>2</sub>O (0.005 g·L<sup>-1</sup>), CoCl<sub>2</sub>·6H<sub>2</sub>O (0.002 g·L<sup>-1</sup>), Na<sub>2</sub>Mo<sub>7</sub>O<sub>24</sub>·4H<sub>2</sub>O (0.002 g·L<sup>-1</sup>), and Na<sub>2</sub>·EDTA  
7 (0.050 g·L<sup>-1</sup>). The HSM-P medium contained K<sub>2</sub>HPO<sub>4</sub> and KH<sub>2</sub>PO<sub>4</sub>, which can be replaced with KCl. The  
8 HSM-S medium contained MgSO<sub>4</sub>·7H<sub>2</sub>O, which can be replaced with MgCl<sub>2</sub>·6H<sub>2</sub>O. Generally, cultures  
9 were maintained in an incubator shaker at a rate of 230 rpm at 25 °C and then exposed to continuous  
10 illumination at a light intensity of 150 μmol·m<sup>-2</sup>·s<sup>-1</sup>. The samples tested in LD conditions were incubated  
11 in a light time of 16 h at daytime and 8 h at dark, whereas samples tested in SD conditions were incubated  
12 in a light time of 8 h at day time and 16 h at dark.

13 Biomass concentration (g/L) was determined by measuring the optical density of the samples at 490  
14 nm (OD<sub>490</sub>), as described by an earlier study [38]. To generate the standard curve, a series of *C.*  
15 *reinhardtii* CC425 samples of different biomass concentrations was collected. The OD<sub>490</sub> value and cell  
16 dry weight were gravimetrically determined using dried cells to plot the standard curve of OD<sub>490</sub> versus  
17 biomass concentration (g/L). The samples were diluted to appropriate ratios to ensure that the measured  
18 OD<sub>490</sub> values ranged from 0.15 to 0.75, if applicable. The biomass concentration was then calculated  
19 using the following formula: cell dry weight (g/L) = 0.7444\*OD<sub>490</sub>-0.0132 (Supplementary data Figure  
20 1).

21

## 22 **Lipid content analysis**

23 Nile Red fluorescence method and GC/MS were performed to determine lipid and TAG levels [39,40].

24 The algal cells were directly stained with 0.1 mg/mL Nile Red for 10 min, and fluorescence was then  
25 measured at excitation and emission wavelengths of 470 and 570 nm, respectively. The fluorescence  
26 value was calculated using the equation: FD (470/570)= (A2-A1), where A2 is the fluorescence value of  
27 the algal cells after staining with Nile Red, and A1 is the fluorescence of algal cells before staining



1 (Supplementary data Figure 2). Total lipid extraction was carried out according to a modified method.  
2 Logarithmic-phase algal cells were collected after centrifugation and extracted using an extraction buffer  
3 (methanol:chloroform:methanoic acid, 2:1:0.1), 1 M KCl, and 0.2 M H<sub>3</sub>PO<sub>4</sub>. The lipids were obtained  
4 after centrifugation at 13780 ×g for 3 min. For TAG separation, Si60 silica TLC plates for thin-layer  
5 chromatography (TLC) was used. The TLC plates were immersed in 0.15 M (NH<sub>4</sub>)<sub>2</sub>SO<sub>4</sub> for 30 s and  
6 stored in an airtight container for two days. The plates were then placed in an oven at 120 °C for 2.5 h  
7 and cooled at room temperature. The samples were then added with N<sub>2</sub> flow. TAGs were observed on  
8 TLC plates via iodine staining. Lipid analysis was conducted as previously described. Fatty acid methyl  
9 esters derived from TAG were analyzed via GC/MS [41]. For microscopic assay, images were acquired  
10 using a Nikon 80i Fluorescence Microscope after the cells were stained with Nile Red. Nile Red signals  
11 were captured at an excitation wavelength of 480 nm, and emission was obtained between 560 and 600  
12 nm [42–44]. A total of 30 cell lipid droplets from each algal strain were examined to determine the  
13 difference between the lipid contents.

14

#### 15 **RNA extraction**

16 Total RNA was prepared as described by Li et al. with modification [45]. Cells from 10 mL of  
17 cultivated algae were collected after centrifugation at 10000 ×g for 1 min. After a series of extractions  
18 using phenol–chloroform, nucleic acids were precipitated with two volumes of absolute ethanol and then  
19 washed with 75% ethanol. Finally, the air-dried pellet was dissolved in 40 μL of RNase-free water. RNA  
20 concentration was determined via spectrophotometry, and the integrity was examined via agarose gel  
21 electrophoresis.

22

#### 23 **Cloning of the *CrCO* gene**

24 The first strand of cDNA was synthesized using SuperScript™ III Reverse Transcriptase (Invitrogen,  
25 USA) according to the manufacturer's instructions. A fragment of the *CrCO* gene was amplified via

1 polymerase chain reaction (PCR) by using primers CrCOL: 5'-ATGTCGAGTTGCGTCGTGTGCG-3'  
2 and CrCOR: 5'-TTAGCACTCAGCGTCCAGGACCTCG-3'. PCR reactions were performed in a final  
3 volume of 25  $\mu$ L containing 1 $\times$  PCR reaction buffer, 2 mM MgCl<sub>2</sub>, 0.4  $\mu$ mol of each primer, 0.25 mM  
4 dNTPs, 1  $\mu$ L of DMSO, 0.5 M Betain, and 0.5 U Taq DNA polymerase (Promega, USA) according to the  
5 following program: 4 min at 95 °C; 35 cycles of denaturation for 40 s at 95 °C, annealing for 40 s at 58  
6 °C, and elongation for 20 s at 72 °C; 10 min at 72 °C. After purification using the EZ-10 Spin Column  
7 DNA Gel Extraction Kit (BBI, Canada), the DNA was inserted into vector pMD18-T following the  
8 manufacturer's instructions (TaKaRa, Japan). The resulting plasmid was designated as pMD18T-CrCO.  
9 The sequences of the cloned *CrCO* gene were verified via double-stranded sequence analysis (Shanghai  
10 Sangon Biological Engineering Technology & Services Co., Ltd).

11

### 12 **Construction of the RNAi vector against the *CrCO* gene**

13 A fragment of *C. reinhardtii* 18S gene was amplified with primers  
14 5'-CGAACTTCTGCGAAAGCAT-3' and 5'-TCAGCCTTGCGACCATACT-3' and then inserted into  
15 pMD18-T to produce pMD18T-18S. The fragment of *CrCO* and its reverse complementary sequences  
16 were amplified via PCR by using pMD18T-CrCO as a template and the following primers: CrCORNAiL:  
17 5'-AGCTGCTACGCACGAGACCG -3', CrCORNAiR: 5'-GCCCATGTCGAGCCAGTTGT -3. The  
18 PCR fragment was then digested with KpnI/BamHI and HindIII/SalI and was inserted into the  
19 corresponding cloning sites of pMD18T-18S to yield pMD18-CrCOF-18S-CrCOR, which contained an  
20 inverted repeat sequence of *CrCO* (CrCO IR). pMD18-CrCOF-18S-CrCOR was double-digested with  
21 KpnI and HindIII to obtain CrCO IR. Finally, the CrCO IR was inserted as a blunt-end fragment into  
22 EcoRI-digested pMaa7/XIR to yield pMaa7IR/ CrCO IR.

23

### 24 **Construction of overexpression vector of *CrCO* gene for *Chlamydomonas***

25 To construct the overexpression vector of the *CrCO* gene, the coding sequence of *CrCO* was  
26 amplified via PCR by using pMD18T-CrCO as a template and primers 5'-  
27 AAAGATCTAATGTCGAGTTGCGTCGTGTG-3' and 5'-AAACTAGTTTAGCACTCAGCGTCCA  
28 GGA-3'. The fragment was digested with NcoI/SpeI and inserted into similarly digested pCAMBIA1302  
29 to produce pCAMCO, which allows the overexpression of *CrCO*.

30

## 1 **Transformation of *Chlamydomonas***

2 The transformation of *C. reinhardtii* strain CC425 was performed as described by Kindle [46]. *C.*  
3 *reinhardtii* cells were grown in a TAP medium to a cell density of  $(1 \text{ to } 2) \times 10^6$  cells/mL. The cells were  
4 collected after centrifugation, washed twice, and resuspended in the TAP medium to a cell density of  
5 approximately  $1 \times 10^8$  cells/mL. Plasmid DNA was introduced into the cells via the glass bead procedure.  
6 In each case, 2  $\mu\text{g}$  of plasmid DNA was included in a mixture containing 400  $\mu\text{L}$  of cells, 100  $\mu\text{L}$  of 20%  
7 polyethylene glycol, and 300 mg of sterile glass beads. The reaction was mixed for 15 s on a benchtop  
8 vortex. To allow the induction of RNAi or gene expression, the cells were allowed to recover for 1 d  
9 before plating onto selective media. RNAi transformants were selected on the TAP medium containing  
10 1.5 mM L-tryptophan, 5  $\mu\text{g}/\text{mL}$  paromomycin, and 5  $\mu\text{M}$  5-FI. pCAMCO transformants were selected on  
11 the TAP medium containing 50  $\mu\text{g}/\text{mL}$  hygromycin. The plates were incubated under dim light  
12 (approximately  $50 \mu\text{mol}\cdot\text{m}^{-2}\cdot\text{sec}^{-1}$  photosynthetically active radiation). The isolated transgenic strains  
13 were kept at a constant selective pressure.

## 15 **Quantitative real-time PCR**

16 The samples were subjected to real-time PCR analysis as described by Fei et al. [47]. RNA was  
17 extracted using a TRIzol Reagent (Shanghai Sangon Biological Engineering Technology & Service Co.).  
18 Single-strand cDNA was synthesized using a Invitrogen SuperScript<sup>TM</sup> III cDNA synthesis kit with 100  
19 ng of RNA and random primers. The synthesis was performed at 65 °C for 5 min, 25 °C for 5 min, and 42  
20 °C for 50 min. Real-time PCR was performed using a BioRad iCycler iQ Real-Time PCR Detection  
21 System with SYBR Green as the fluorescent dye. Each reaction was performed in a final volume of 25  
22  $\mu\text{L}$  with the following components: 0.2 pmoles of each primer, 1  $\mu\text{L}$  of cDNA, 12.5  $\mu\text{L}$  of SYBR Green  
23 Mix (Invitrogen SYBR GreenER qPCR), and water to adjust the volume to 25  $\mu\text{L}$ . The iCycler protocol  
24 was as follows: denaturing at 95 °C, 5 min; 40 cycles of (denaturing at 95 °C, 30 s; annealing at 54 °C, 30  
25 s; amplification at 72 °C, 15 s). The specificity of the PCR amplification was examined using a melting  
26 curve program (55 °C to 100 °C at a heating rate of 0.5 °C/s). 18S rRNA was used as the control sample  
27 with primers 18SrRNAF (5'-TCAACTTTCGATGGTAGGATAGTG-3') and 18SrRNAR  
28 (5'-CCGTGTCAGGATTGGGTAATTT-3'). 18S rRNA expression was measured and determined to be  
29 constant at all conditions. The gene-specific primers listed in [Supplementary data table 1](#) were used to  
30 evaluate the quantity of target cDNA. The amplification rate of each transcript (Ct) was calculated via the

1 PCR baseline-subtracted method and performed in the iCycler software at a constant fluorescence level.  
2 Cts were determined over three repeats. Relative fold differences were calculated based on the relative  
3 quantification analytical method ( $2^{-\Delta\Delta CT}$ ) by using 18s rRNA amplification as the internal standard  
4 [48].

## 6 **Authors' contributions**

7 XDD performed the molecular biology studies, participated in data analysis, and drafted the manuscript. PL  
8 performed the detection of the mRNA levels of the genes and documented all microscopic images. XZF performed the  
9 lipid and TAG content detection. XWF performed the statistical analysis, conceived the study, participated in designing the  
10 study, coordinated the research, and assisted in drafting the manuscript.

## 12 **Ethics statement**

13 This paper does not contain any studies with human or animal subjects performed by other authors.

## 15 **Acknowledgement**

16 This study was supported by the National Natural Science Foundation of China (31160050,  
17 31360051, 31000117), Major Technology Project of Hainan (ZDZX2013023-1), National Nonprofit  
18 Institute Research Grants (CATAS-ITBB110507, 130305), Funds of Hainan Engineering and  
19 Technological Research (GCZX2011006, GCZX2012004, GCZX2013004), and Natural Science  
20 Foundation of Hainan Province (313077).

## 22 **References**

- 24 1. Russell WK, Stuber C(1983) Effects of photoperiod and temperatures on the duration of vegetative in maize. *Agro J*  
25 75:795-802
- 26 2. Imaizumi T, Schultz TF, Harmon FG, et al. (2005) FKF1, F-box protein mediates cyclic degradation of a  
27 repressor of CONSTANS in Arabidopsis. *Science*. 309:293-297.
- 28 3. Kobayashi Y, Weigel D. (2007) Move on up, it's time for change-mobile signals controlling  
29 photoperiod-dependent flowering. *Genes Dev* 21: 2371-2384.
- 30 4. Yano M, Katayose Y, Ashikari M, et al. (2000) Hd1, a major photoperiod sensitivity quantitative trait locus in rice, is  
31 closely related to the Arabidopsis flowering time gene CONSTANS. *Plant Cell* 12: 2473-2484.
- 32 5. Nemoto Y, Kisaka M, Fuse T, et al.(2003) Characterization and functional analysis of three wheat genes with

- 1       homology to the CONSTANS flowering time gene in transgenic rice. *Plant J* 361: 82-93.
- 2   6. Drobyazina PE, Khavkin EE. (2006) A Structural homolog of CONSTANS in potato. *Plant*  
3    *Physiol* 53:698-701.
- 4   7. Polina E, Drobyazina, Emil E, et al. (2011) The structure of two CONSTANS-LIKE1 genes in potato and its wild  
5    relatives. *Gene* 471: 37-44.
- 6   8. Serrano G, Herrera-Palau R, Romero JM, et al.(2009) Chlamydomonas CONSTANS and the evolution of plant  
7    photoperiodic signaling. *Curr Biol* 195: 359-368.
- 8   9. Yuceer C, Harkess RI. (2002)Structure and developmental regulation of CONSTANS-LIKE genes isolated from  
9    *Populus deltoids*. *Plant Sci* 163:615-625.
- 10  10. Griffiths S, Dunfordr P, Coupiand G. (2003) Laurieda, The evolution of CONSTANS-LIKE gene  
11   families in barley, rice and Arabidopsis. *Plant Physiol* 131:1855-1867.
- 12  11. Bennaimo, Eshed R, Parni S A, et al. (2006) The CCAAT binding factor can mediate  
13   interactions between CONSTANS-LIKE proteins and DNA. *Plant J* 46:462-476.
- 14  12. Iauj, Yu J, Mcintosh I, Kende, Zeevaart JA (2001) Isolation of a CONSTANS ortholog from  
15   *Pharbitis nil* and its role in flowering. *Plant Physiol* 125: 1821-1830.
- 16  13. Schranz M E, Mitcheio T (2006) Independent ancient polyploidy events in the sister families  
17   Brassicaceae and Cleomaceae. *Plant Cell* 18:1152-1165.
- 18  14. Chae S, Jung J Y, An G. Expressed sequence tags of radish flower buds and characterization of a CONSTANS LIKE  
19   1 gene. *Mol Cells[J]*.1998, 8(4):452-458.
- 20  15. Hecht V, Foucher F, Ferrandiz C, Macknight R (2005) Conservation of Arabidopsis flowering genes in model  
21   legumes. *Plant Physiol* 137:1420-1434.
- 22  16. Martin J, Strgaard M, Andersen CH, Nielsen KK (2004) Photoperiodic regulation of flowering in perennial  
23   ryegrass involving a CONSTANS-LIKE homolog. *Plant Mol Biol* 56:159-169.
- 24  17. Robson F, Costa MM, Hepworth SR, Vizir I (2001) Functional importance of conserved domains in the  
25   flowering- time gene CONSTANS demonstrated by analysis of mutant alleles and transgenic  
26   plants. *Plant J* 28:619-631.
- 27  18. Griffiths S, Dunfordr P, Laurieda G (2003)The evolution of CONSTANS-LIKE gene families in  
28   barley, rice and Arabidopsis. *Plant Physiol* 131:1855-1867.
- 29  19. Orna BN, Ravit E, Anna P, et al. (2006) The CCAAT binding factor can mediate interactions  
30   between CONSTANS-like proteins and DNA. *Plant J* 46:462-476.
- 31  20. Robert LS, Robson F, Sharpe A, et al. (1998) Conserved structure and function of the  
32   *Arabidopsis* flowering time gene CONSTANS in *Brassica napus*. *Plant Mol Biol* 375: 763-772.
- 33  21. Holfors A, Opseth L, Rosnes AKR, Ripel L, Snipen L, Fos-sdal CG, and Olsen JE (2009) Identification of  
34   PaCOL1 and PaCOL2, two CONSTANS-Like genes showing decreased transcript levels preceding short day  
35   induced growth cessation in Norway spruce. *Plant Physiology and Biochemistry* 47:105-115
- 36  22. Borden K L (1998) RING fingers and B-boxes: zinc-binding protein-protein interaction domains.  
37   *Biochem Cell Biol* 762: 351-358.
- 38  23. Corbesier L, Coupland G (2005) Photoperiodic flowering of Arabidopsis: integrating genetic and  
39   physiological approaches to characterization of the floral stimulus. *Plant Cell and Environment* 28: 54-66.
- 40  24. Strayer C, Oyama T, Schultz TF, et al. (2000) Cloning of the Arabidopsis clock gene TOC1,  
41   an autoregulatory response regulator homolog. *Science* 289: 768-771.
- 42  25. Torok M, Elkin LD (2000) Two B or not two B? Overview of the rapidly expanding  
43   B-box family of proteins. *Differentiation* 673: 63-71.
- 44  26. Khanna R, Kronmiller B, Maszle DR, et al. (2009) The Arabidopsis B-box zinc finger family.

- 1 Plant Cell 21: 3416-3420.
- 2 27. Robson F, Costa MM, Hepworth SR, et al. (2001) Functional importance of conserved domains in the  
3 flowering-time gene CONSTANS demonstrated by analysis of mutant alleles and transgenic  
4 plants. *Plant J* 28: 619-631.
- 5 28. Ben NO, Eshed R, Parnis A, et al. (2006) The CCAAT binding factor can mediate interactions  
6 between CONSTANS-like proteins and DNA. *Plant J* 46: 462-476.
- 7 29. Griffiths S, Dunford RP, Coupland G, et al. (2003) The evolution of CONSTANS-like gene families  
8 in barley, rice, and *Arabidopsis*. *Plant Physiol* 1314: 1855-1867.
- 9 30. Jang S, Marchal V, Panigrahi KCS, et al. (2008) *Arabidopsis* COP1 shapes the temporal pattern of CO  
10 accumulation conferring a photoperiodic flowering response. *EMBO J* 27: 1277-1288.
- 11 31. Kumagai T, Ito S, Nakamichi N, Niwa Y, Murakami M, Yamashino T, Mizuno T (2008) The common  
12 function of a novel subfamily of B-box zinc finger proteins with reference to circadian-associated  
13 events in *Arabidopsis thaliana*. *Biosci Biotechnol Biochem* 72: 1539-1549
- 14 32. Indorf M, Cordero J, Neuhaus G, Rodriguez FM (2007) Salt tolerance (STO), a stress-related protein, has a major  
15 role in light signaling. *Plant J* 51: 563~574
- 16 33. Datta S, Hettiarachchi C, Johansson H, Holm M (2007) SALT TOLERANCE HOMOLOG2, a B-box protein in  
17 *Arabidopsis* that activates transcription and positively regulates light mediated development. *Plant Cell* 19:  
18 3242-3255
- 19 34. Datta S, Johansson H, Hettiarachchi C, Irigoyen ML, Desai M, Rubio V, Holm M (2008) LZFI/SALT  
20 TOLERANCE HOMOLOG3, an *Arabidopsis* B-box protein involved in light-dependent development and  
21 gene expression, undergoes COP1-mediated ubiquitination. *Plant Cell* 20: 2324-2328
- 22 35. Chang CJ, Li YH, Chen LT, Chen WC, Hsieh WP, Shin J, Choi G, Hu JM (2008) LZFI, a HY5-regulated  
23 transcriptional factor, functions in *Arabidopsis* de-etiolation. *Plant J* 54: 205-219
- 24 36. Ral JP, Colleoni C, Wattedled F, Dauville ED, Nempont C, Deschamps P, Li Z, Morell MK, Chibbar R, Purton S,  
25 et al. (2006) Circadian Clock Regulation of Starch Metabolism Establishes GBSSI as a Major Contributor to  
26 Amylopectin Synthesis in *Chlamydomonas reinhardtii*. *Plant Physiol* 142:305–317.
- 27 37. Harris EH (1989) *The Chlamydomonas source book: a comprehensive guide to biology and laboratory use.*  
28 Academic Press, San Diego, CA.
- 29 38. Deng XD, Gu B, Li YJ, Hu XW, Guo JC and Fei XW (2012) The Roles of acyl-CoA: Diacylglycerol  
30 Acyltransferase 2 Genes in the Biosynthesis of Triacylglycerols by the Green Algae *Chlamydomonas reinhardtii*.  
31 *Mol Plant* 5:945-947.
- 32 39. Deng XD, Li YJ, Fei XW (2011) The mRNA abundance of *pepc2* gene is negatively correlated with oil content in  
33 *Chlamydomonas reinhardtii*. *Biomass Bioenerg* 35: 1811-1817.
- 34 40. Liu B, Vieler A, Li C, Daniel Jones A, Benning C. (2013) Triacylglycerol profiling of microalgae *Chlamydomonas*  
35 *reinhardtii* and *Nannochloropsis oceanica*. *Bioresour Technol.* 146:310-316.
- 36 41. La Russa M, Bogen C, Uhmeyer A, Doebbe A, Filippone E, Kruse O, Mussnug J H (2012) Functional analysis of  
37 three type-2 DGAT homologue genes for triacylglycerol production in the green microalga *Chlamydomonas*  
38 *reinhardtii*. *Journal of biotechnology*, 162:13-20

- 1 42. Gao CF, Xiong W, Zhang YL, Yuan WQ, Wu QY (2008) Rapid quantitation of lipid in microalgae by time-domain  
2 nuclear magnetic resonance. *J Microbiol Meth* 75:437-440.
- 3 43. Huang GH, Chen G, Chen F (2009) Rapid screening method for lipid production in alga based on Nile red  
4 fluorescence. *Biomass Bioenerg* 33:1386-1392.
- 5 44. Chen W, Zhang C, Song L, Sommerfeld M, Hu Q (2009) A high throughput Nile red method for quantitative  
6 measurement of neutral lipids in microalgae. *J Microbiol Meth* 77:41-47.
- 7 45. Li YJ, Fei XW and Deng XD (2012) Novel molecular insights into nitrogen starvation-induced triacylglycerols  
8 accumulation revealed by differential gene expression analysis in green algae *Micractinium pusillum*. *Biomass  
9 Bioenerg* 42:199-211.
- 10 46. Kindle KL (1990) High frequency nuclear transformation of *Chlamydomonas reinhardtii*. *Proc Natl Acad Sci USA*  
11 87, 1228-1232.
- 12 47. Fei XW. and Deng XD (2007) A novel Fe deficiency responsive element (FeRE) regulates the expression of *atx1* in  
13 *Chlamydomonas reinhardtii*. *Plant Cell Physiol* 48: 1496-1503.
- 14 48. Livak KJ and Schmittgen TD (2001) Analysis of relative gene expression data using real-time quantitative PCR and  
15 the 2<sup>-</sup>(Delta Delta C(T)). *Method Methods* 25: 402-408.
- 16

## 17 **Figure Legends**

18 Figure 1 Growth curve and lipid contents of *C. reinhardtii* CC425 cultivated in LD or SD conditions. A) Growth curve  
19 of *C. reinhardtii* CC425 cultivated in LD conditions and at -S or -P limitation conditions; B) Growth curve of *C.*  
20 *reinhardtii* CC425 cultivated in SD conditions and at -S or -P limitation conditions; C) Lipid contents of *C. reinhardtii*  
21 CC425 cultivated in LD conditions and at -S or -P limitation conditions; D) Lipid contents of *C. reinhardtii* CC425  
22 cultivated in SD conditions and at -S or -P limitation conditions. HSM, cells cultivated in the HSM medium; HSM-S,  
23 cells cultivated in the S-free HSM medium; and HSM-P, cells grown in the P-free HSM medium.

24

25 Figure 2 Microscopic observations of *C. reinhardtii* under LD or SD conditions after four days of cultivation. Algal cell  
26 was observed using a Zeiss fluorescence microscope (10X25) after staining with Nile Red dye. Orange fluorescence  
27 indicates that the oil droplet is mainly composed of TAG. LD conditions (16 h day time and 8 h dark time); SD  
28 conditions (8 h day time and 16 h dark time). HSM, cells cultivated in the HSM medium; HSM-S, cells cultivated in the  
29 S-free HSM medium; and HSM-P, cells grown in the P-free HSM medium. The scale bar indicated in the figure is 3  $\mu$  m.

1  
2  
3  
4  
5  
6  
7  
8  
9  
10  
11  
12  
13  
14  
15  
16  
17  
18  
19  
20  
21  
22  
23  
24  
25  
26  
27  
28  
29  
30

Figure 3 Abundance of mRNA of *CrCO* in HSM, HSM-N, and HSM-P media. mRNA levels of *C. reinhardtii* CC425 samples grown in the indicated medium for 1, 2, 3, or 4 d in full daylight were analyzed via RT-PCR. HSM, cells cultivated in the HSM medium; HSM-S, cells cultivated in the S-free HSM medium; and HSM-P, cells grown in the P-free HSM medium.

Figure 4 The biomass, lipid content detected by Nile Red fluorescence method and TAG level, and the mRNA abundance of *CrCO* in *CrCO* RNAi transgenic *C. reinhardtii*. Cr.CC425, *C. reinhardtii* CC425; Cr.Maa7, pMaa7IR/XIR transgenic algae strain; CrCO RNAi18 (31, 87), and pMaa7IR/CrCOIR transgenic algae strains. Statistical analysis was performed using SPSS statistical software. Significance is indicated as \*P < 0.05, \*\* P < 0.01.

Figure 5 mRNA abundance of *PDAT3*, *DGAT2*, *PFK1*, *FBP1*, *CIS*, and *PAP2* in *CrCO* RNAi transgenic algae strain, CrCO RNAi18. Cr CC425, *C. reinhardtii* CC425; Cr.Maa7, pMaa7IR/XIR transgenic algae strain; CrCO RNAi18, and pMaa7IR/CrCOIR transgenic algae strain number 18.

Figure 6 Microscopic observations of *CrCO* transgenic *C. reinhardtii*. After six days of cultivation in full daylight and HSM medium, more oil droplets of *CrCO* RNAi transgenic algae were found. Cr.Maa7, pMaa7IR/XIR transgenic algae strain; CrCO RNAi18, and pMaa7IR/CrCOIR transgenic algae strain number 18. The scale bar indicated in the figure is 2  $\mu$ m.

Figure 7 Lipid contents of *CrCO* transgenic strains cultivated at LD or SD conditions condition. A) Lipid contents of *CrCO* transgenic strains cultivated under SD conditions in the HSM medium; B) Lipid contents of *CrCO* transgenic strains cultivated under LD conditions in the HSM medium; C) Lipid contents of *CrCO* transgenic strains cultivated under SD conditions in the HSM-P medium; D) Lipid contents of *CrCO* transgenic strains cultivated under LD conditions in the HSM-P medium; E) Lipid contents of *CrCO* transgenic strains cultivated under SD conditions in the HSM-S medium; F) Lipid contents of *CrCO* transgenic strains cultivated under LD conditions in the HSM-S medium;. Cr.Maa7, pMaa7IR/XIR transgenic algae strain; CrCO RNAi18 (31, 87), and pMaa7IR/CrCOIR transgenic algae strains.

Figure 8 Biomass and lipid content detected via the Nile Red fluorescence method, TAG level, and mRNA abundance of *CrCO* in *CrCO*-overexpressed transgenic *C. reinhardtii*. Cr.CC425, *C. reinhardtii* CC425; Cr.pCAMBIA, pCAMBIA1302 transgenic algae strain; pCACO11 (64, 91), and pCAMCO transgenic algae strains. Statistical



1 analysis was performed using SPSS. Significance is indicated as \*P < 0.05, \*\* P < 0.01.

2

3 Figure 9 Lipid content in transgenic algae line detected via Nile red staining. After six days of cultivation in the HSM  
4 medium, little oil droplets of *CrCO* transgenic algae were found. Cr.pCAMBIA, pMCAMBIA1302 transgenic algae  
5 strain; pCACO64, and pCAMCO transgenic algae strain number 64. The scale bar indicated in the figure is 2  $\mu$  m.

6

7

8

9

10

11

12

13

14

15

16

17

18

19

20

21

22

23

24

25

26

27

28

29

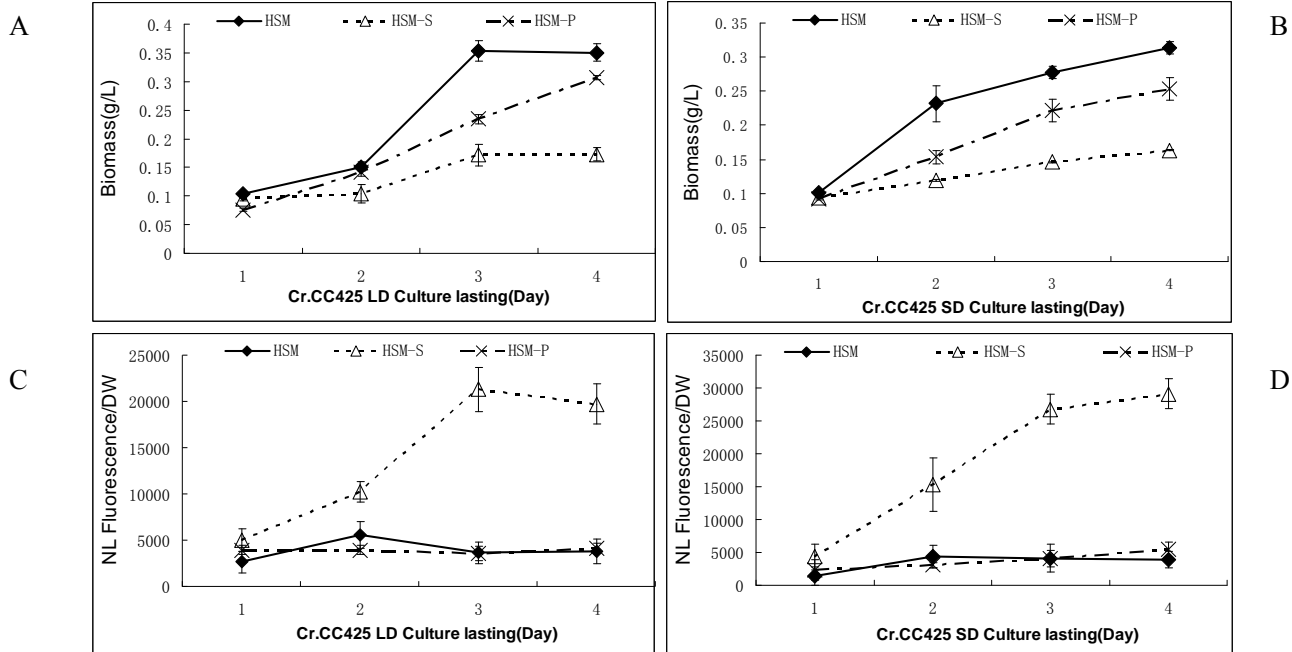

Figure 1

1  
2  
3  
4  
5  
6  
7  
8  
9  
10  
11  
12  
13  
14  
15  
16  
17  
18  
19  
20  
21  
22  
23  
24  
25  
26  
27  
28  
29

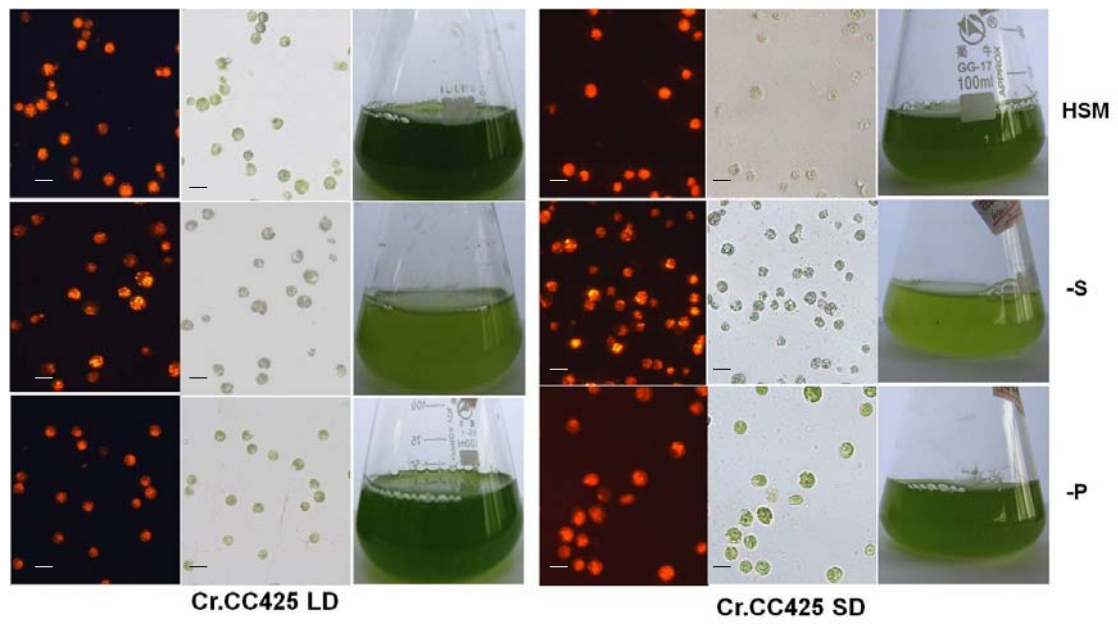

1  
2  
3  
4  
5  
6  
7  
8  
9  
10  
11  
12  
13  
14  
15  
16  
17  
18  
19  
20

Figure 2

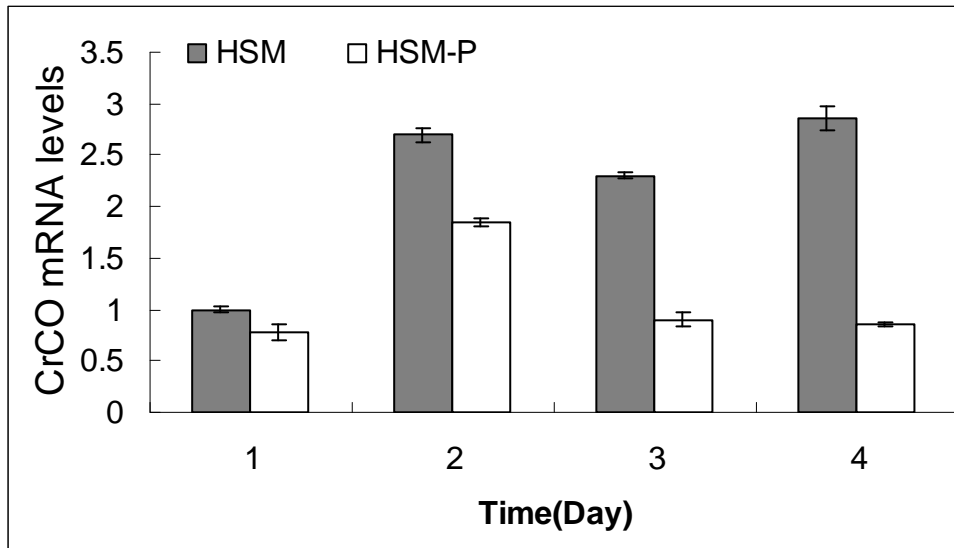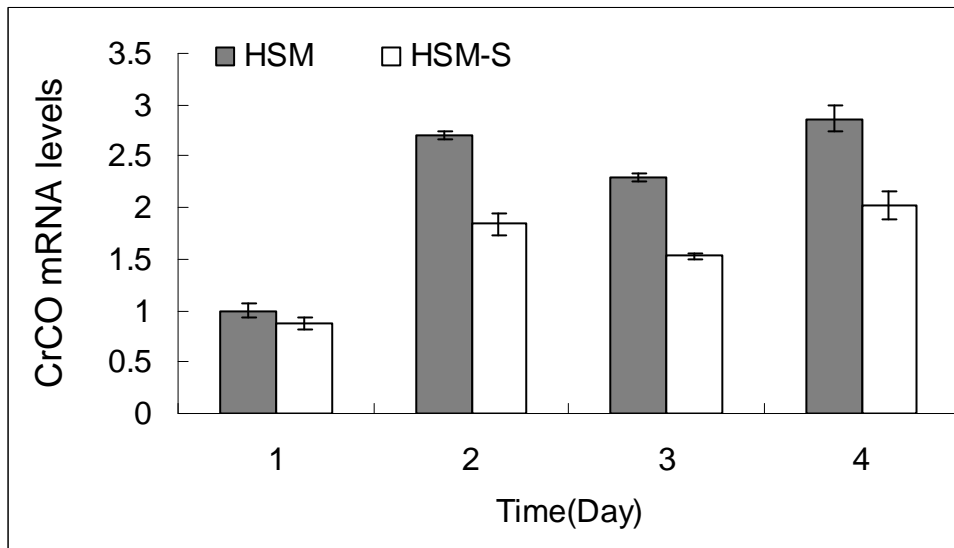

1  
2  
3  
4  
5  
6  
7  
8  
9  
10  
11  
12  
13  
14

Figure 3

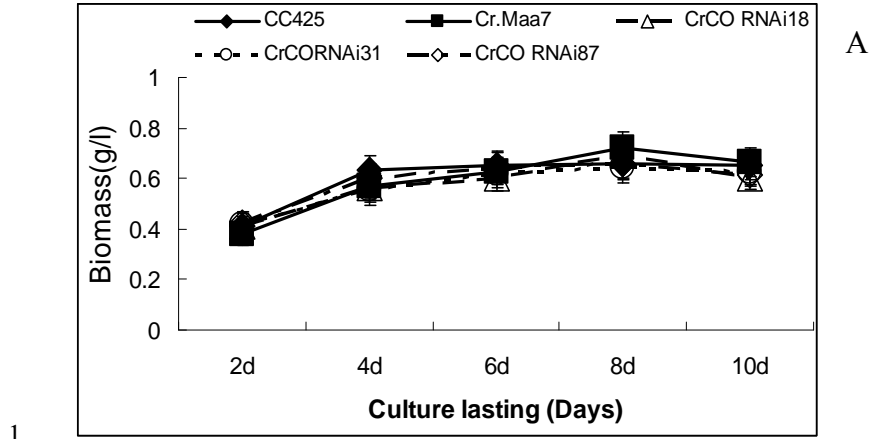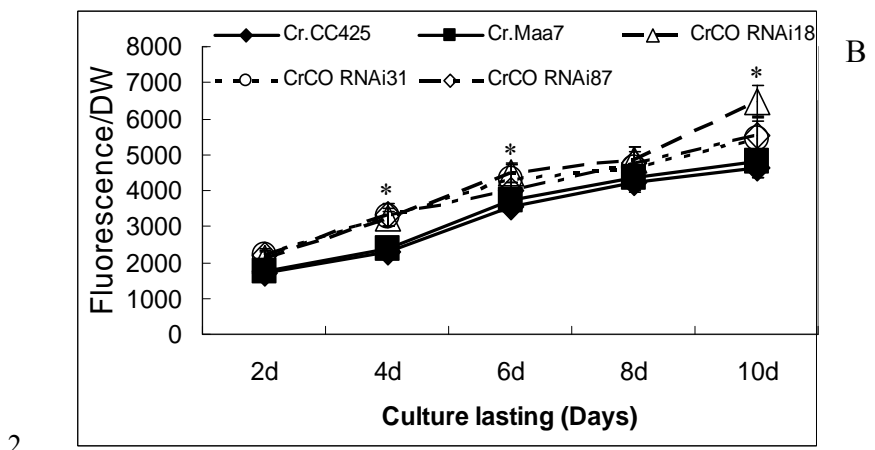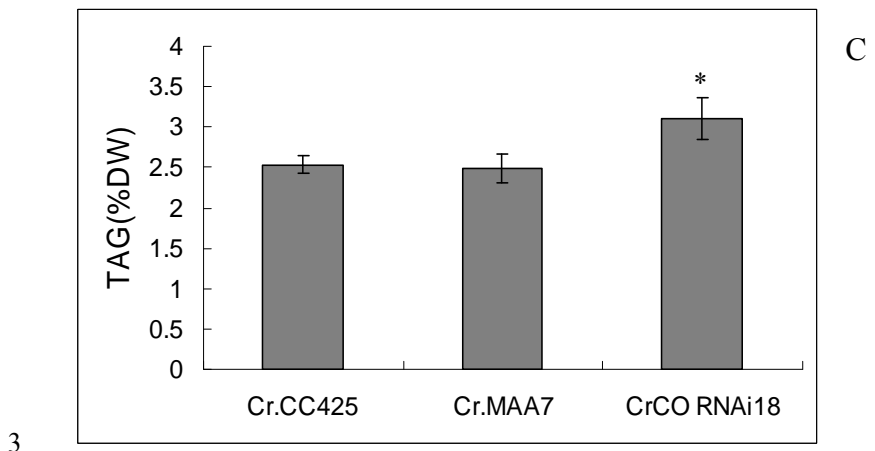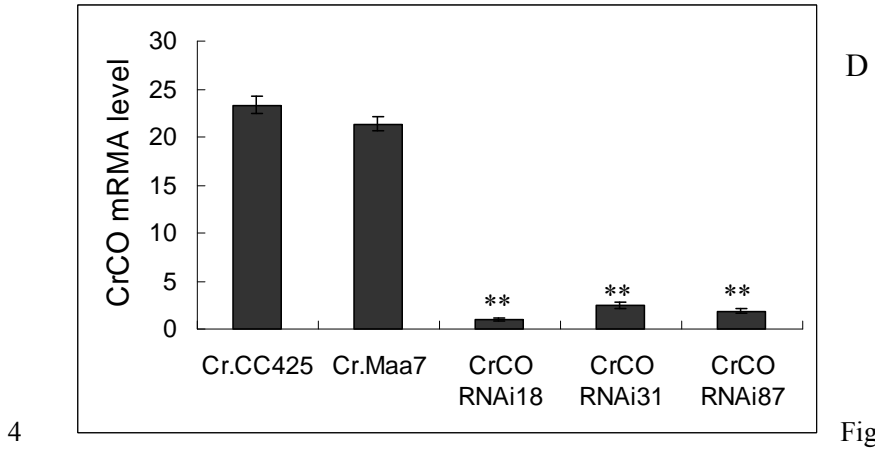

Figure 4

1

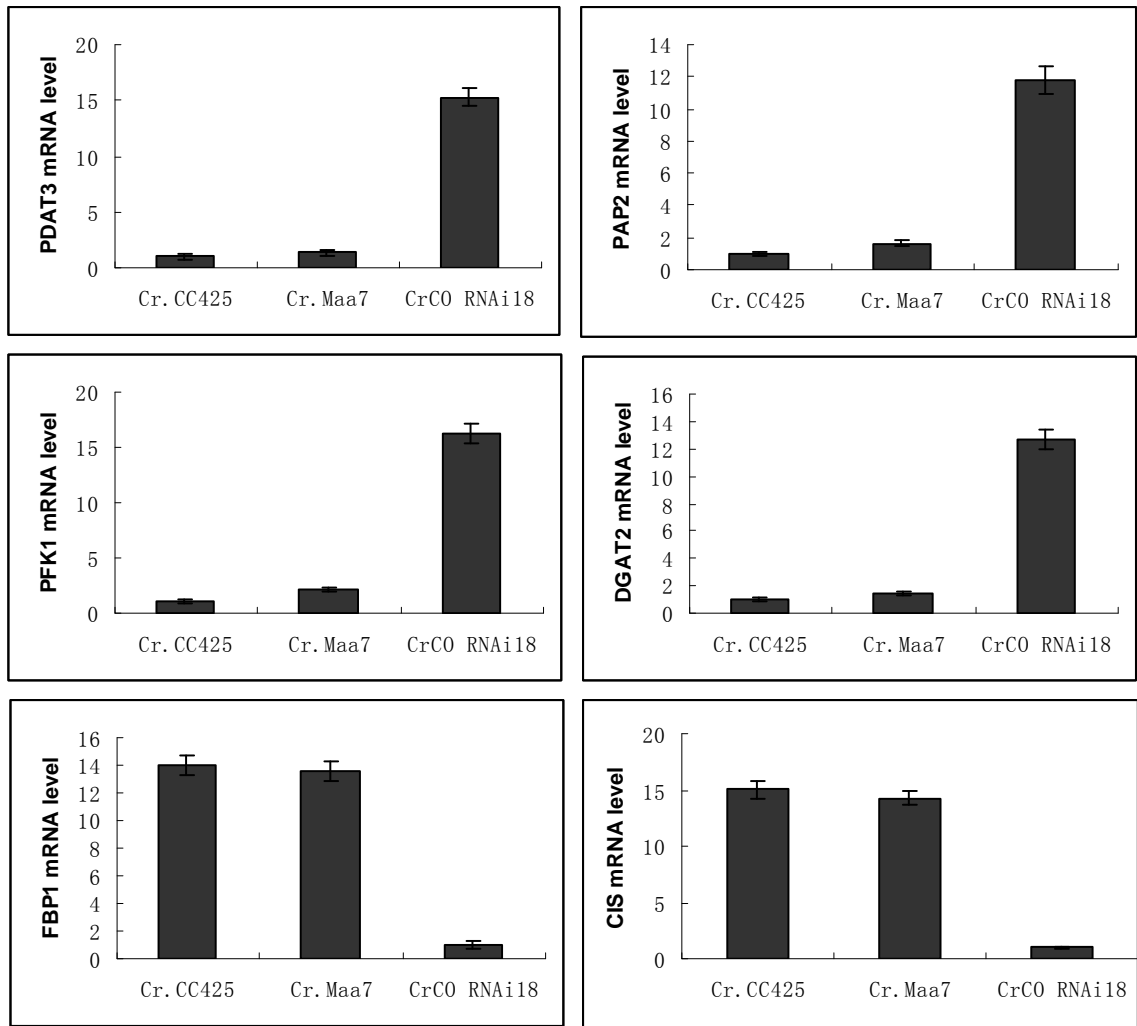

2

3 Figure 5

4

5

6

7

8

9

10

11

12

13

14

15

16

17

18

19

1

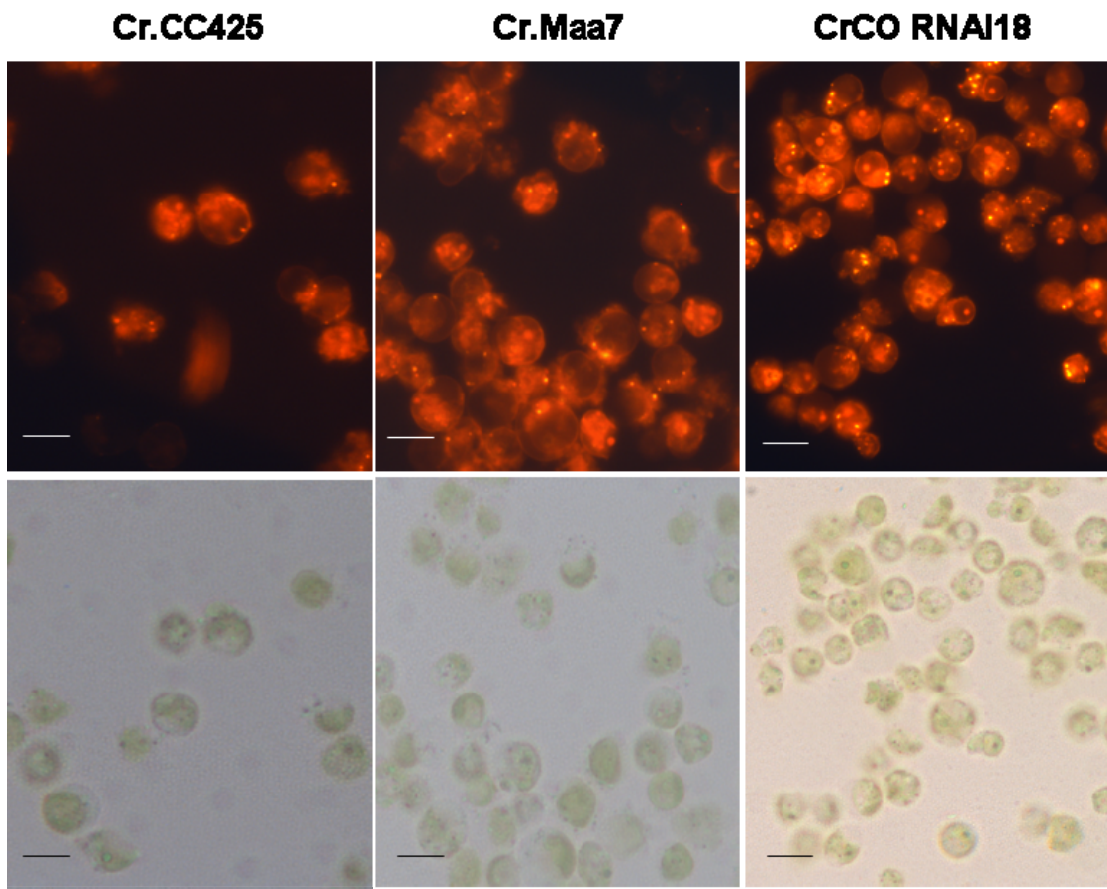

2

3 Figure 6

4

5

6

7

8

9

10

11

12

13

14

15

16

17

18

19

20

21

22

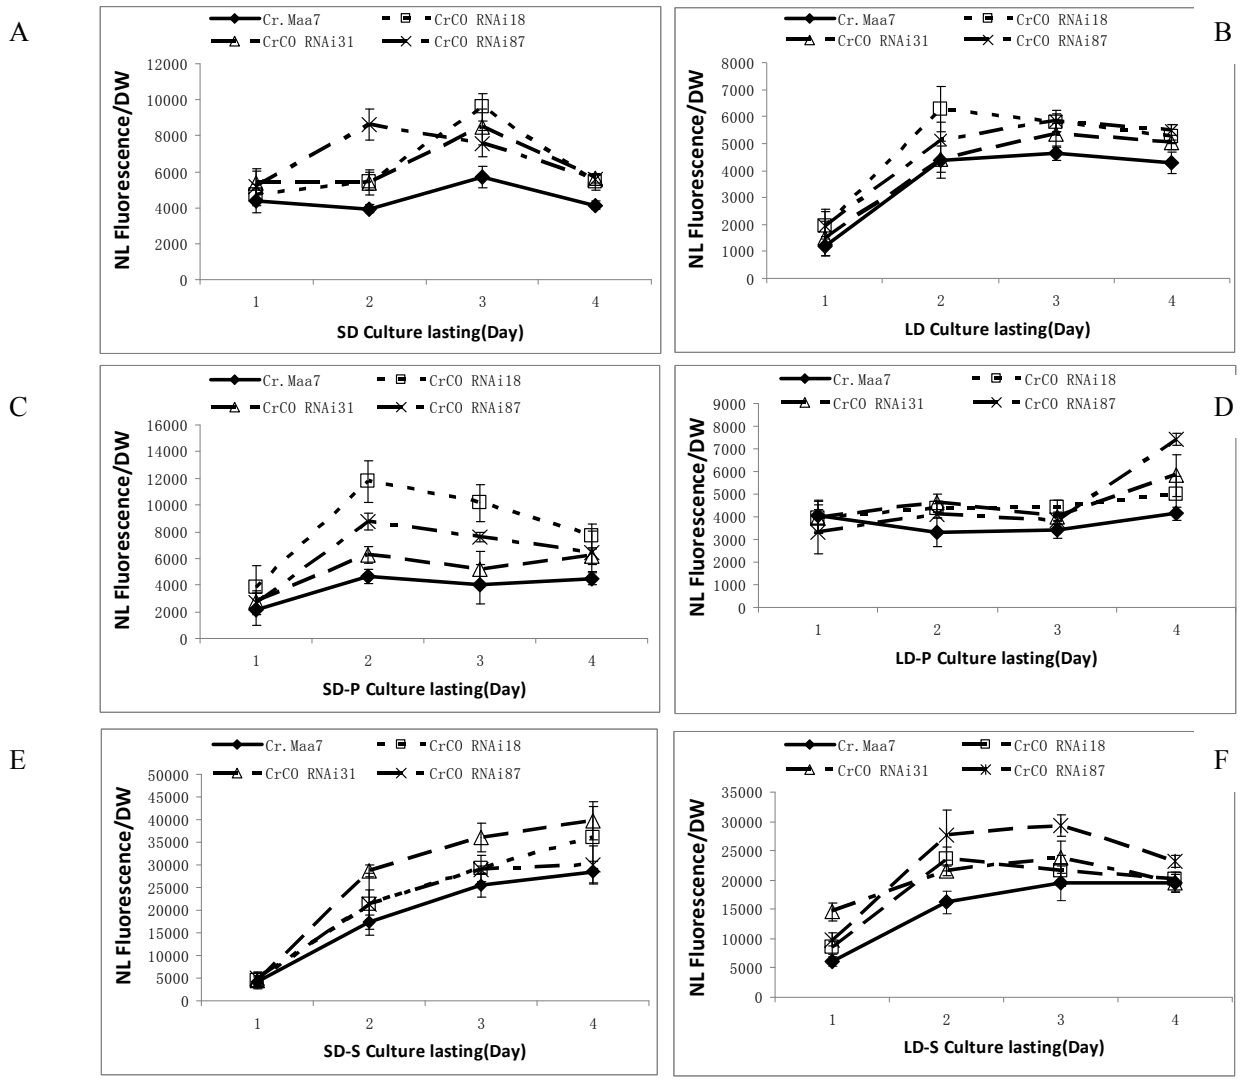

Figure 7

1  
2  
3  
4  
5  
6  
7  
8  
9  
10  
11  
12  
13  
14  
15  
16  
17



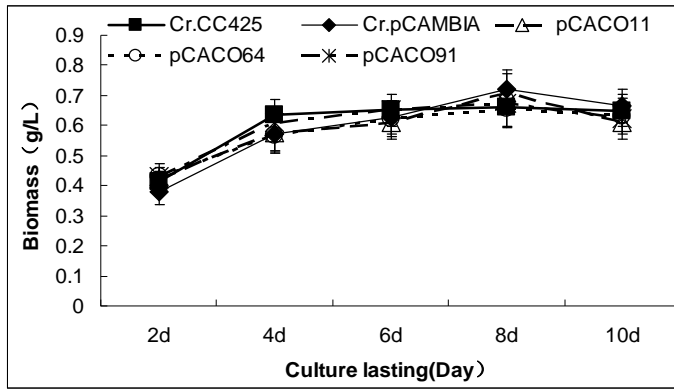

A

1

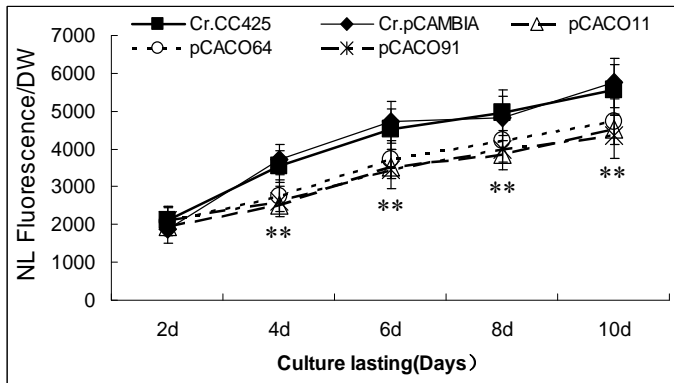

2

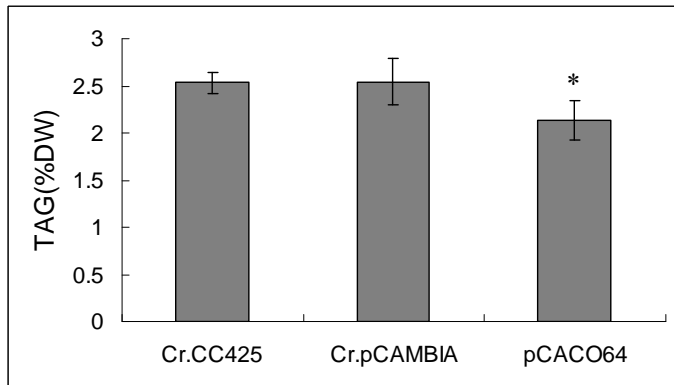

B

3

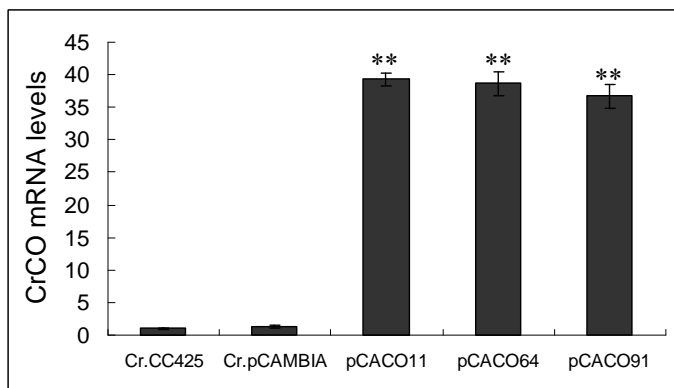

D

4

Figure 8

5

6

7

8

1

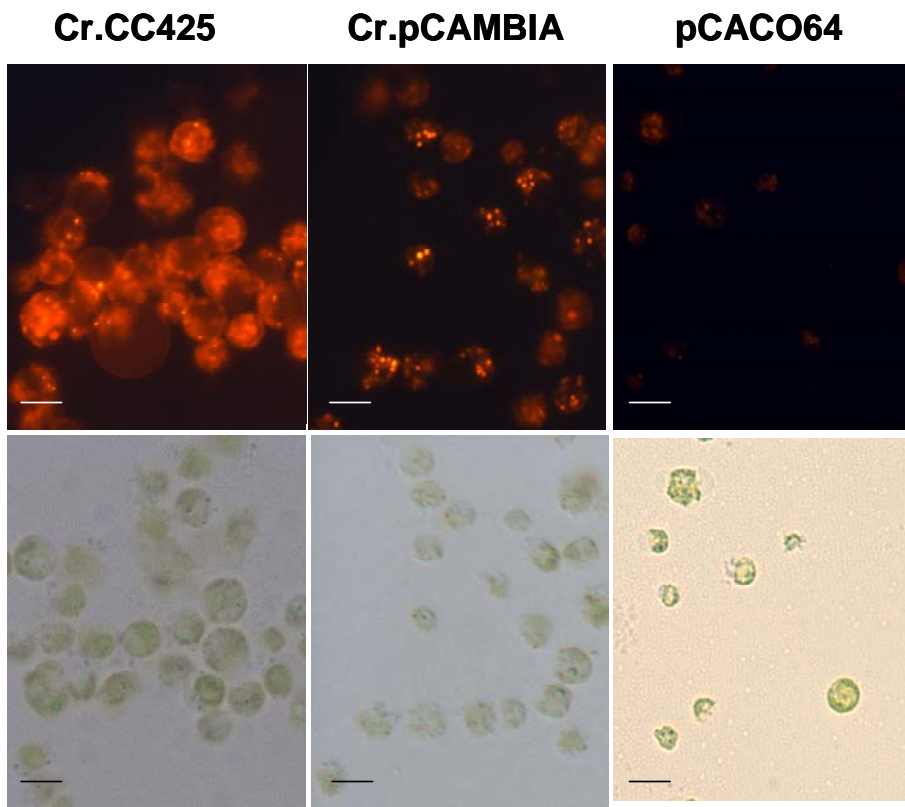

2

3 Figure 9

4

5

6

7
