# Supplementary material for: A Photoperiod-Regulating GeneCONSTANSIs Correlated to Lipid Biosynthesis inChlamydomonas reinhardtii
Source: Hindawi journal article supplement (doi:10.1155/2015/715020), 2015-01-01
Supplement: f3 [file 715020.f3.pdf]

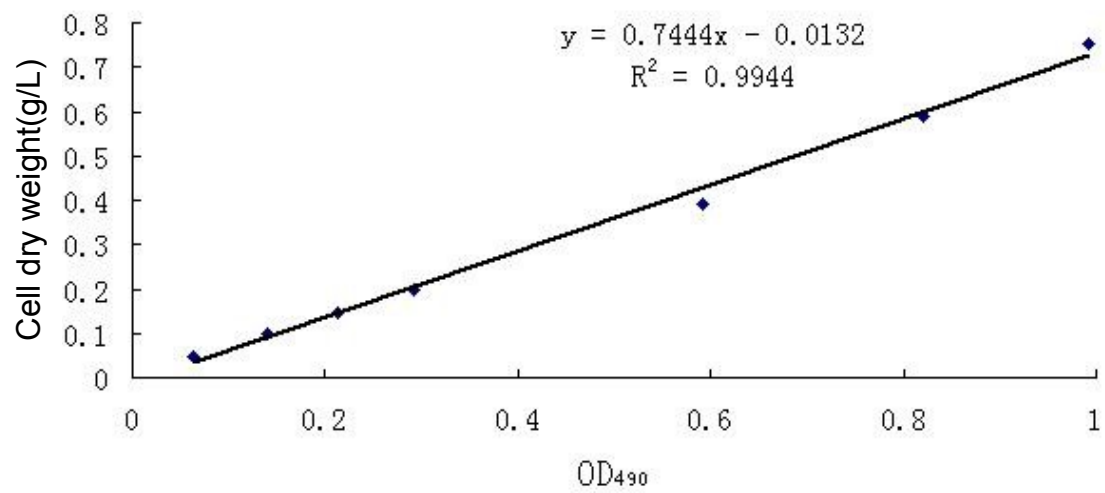

Supplementary data Figure 1 the correlation between biomass (Cell dry weight g/L) and the optical density  
OD<sub>490</sub>

18

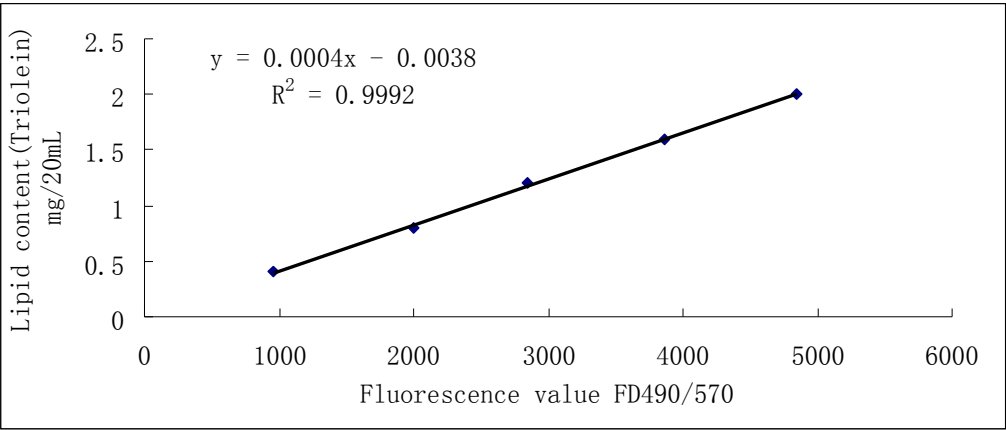

19

20Supplementary data Figure 2 the correlation between lipid concentration (Triolein mg/20mL) and the fluorescence  
21value FD470/570

22

23

24

25

26

27

28

29

30

31

32

33

34

35

36

37Supplementary data Table1 Primers for Real Time PCR

| Gene           | Primer sequence                                             |
|----------------|-------------------------------------------------------------|
| <i>CrCIS</i>   | 5'-GACGCGCACAGCGGCGTGCT -3'<br>5'- CCTCCCTCCTTCATGTGTGT-3'  |
| <i>CrDGAT2</i> | 5'-GCTGGCTTCAAACCTTCTGG-3'<br>5'-CACCTTGTCCACCTGTATGG-3     |
| <i>CrPAP2</i>  | 5'-GCGTGTTTGCCTACTTCCTC-3'<br>5'-CACTACTCGCGCCGTACAT-3      |
| <i>CrCO</i>    | 5'- AGCTGCTACGCACGAGACCG -3'<br>5'- GCCCATGTCGAGCCAGTTGT -3 |
| <i>CrPDAT3</i> | 5'-ATGTGTGAGGCTGAGGCAGT-3'<br>5'-TCAGCTGATGACCAGCGGTCG-3'   |
| <i>CrFBP1</i>  | 5'-GTCCTTCTCCTCGTCGTCGTC-3'<br>5'-ACACCACGTCCAGCTTCTTC-3'   |
| <i>CrPFK2</i>  | 5'-CTGGGCATCAAGTACGGATT-3'<br>5'-AAGCCAAAGCACTTGTTCGAT-3'   |

38

39

40

41

42

43

44

45

46

47
